# Supplementary material for: Rational design of functionalized polyacrylate-based high internal phase emulsion materials for analytical and biomedical uses
Source: Royal Society of Chemistry journal article supplement (doi:10.1039/c6py01992g), 2016-01-01
Supplement: c6py01992g1.pdf [file c6py01992g1.pdf]

## Supporting Informations

to

### Rational design of functionalized polyacrylate-based high internal phase emulsion materials for analytical and biomedical uses

**Gloria Brusotti, Enrica Calleri, Chiara Milanese, Laura Catenacci, Giorgio Marrubini,  
Milena Sorrenti, Alessandro Girella, Gabriella Massolini, Giuseppe Tripodo**

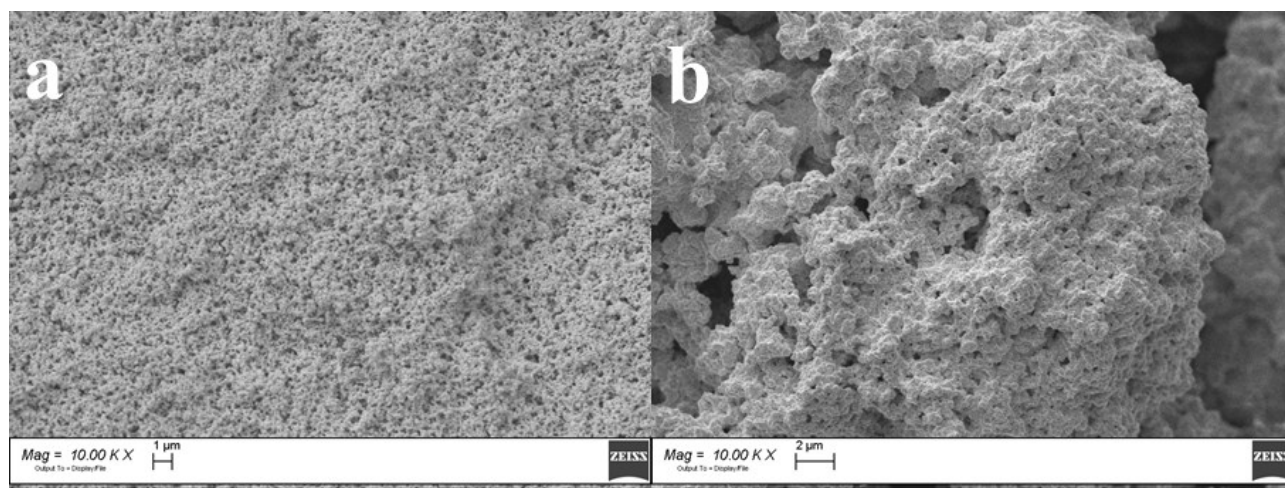

**Figure SI1.** SEM of a) HIPE 1.0 and b) HIPE 1.1 at 10000 X

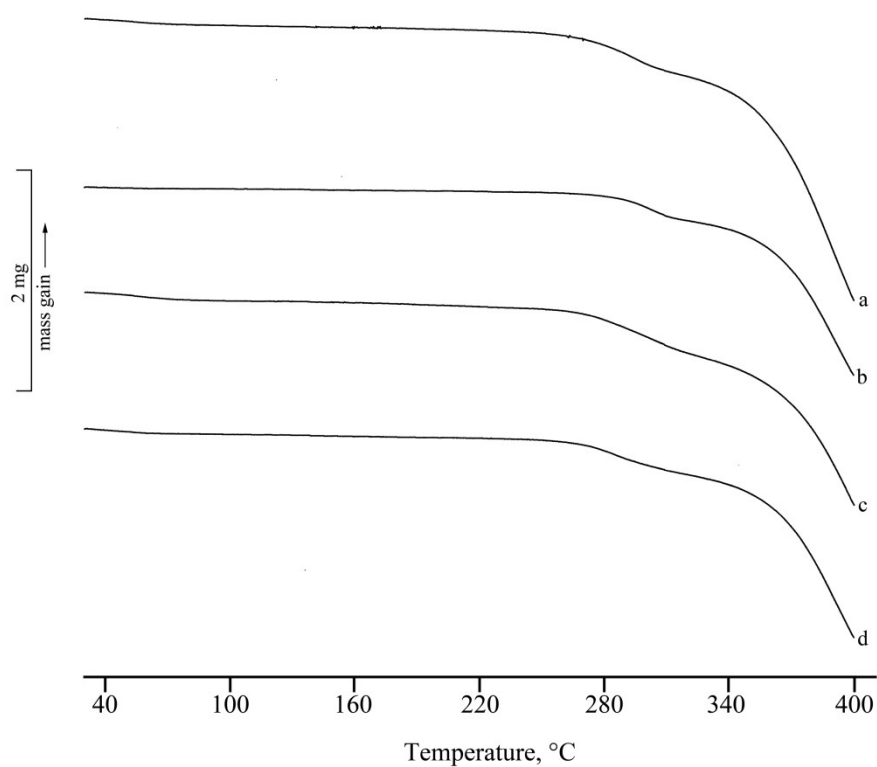

**Figure SI2.** TGA curves for a) HIPE 2.0 before THF washing; b) HIPE 2.0 after THF washing; c) HIPE 2.2.1 (THF washed); and d) HIPE 2.3.1 (THF washed).

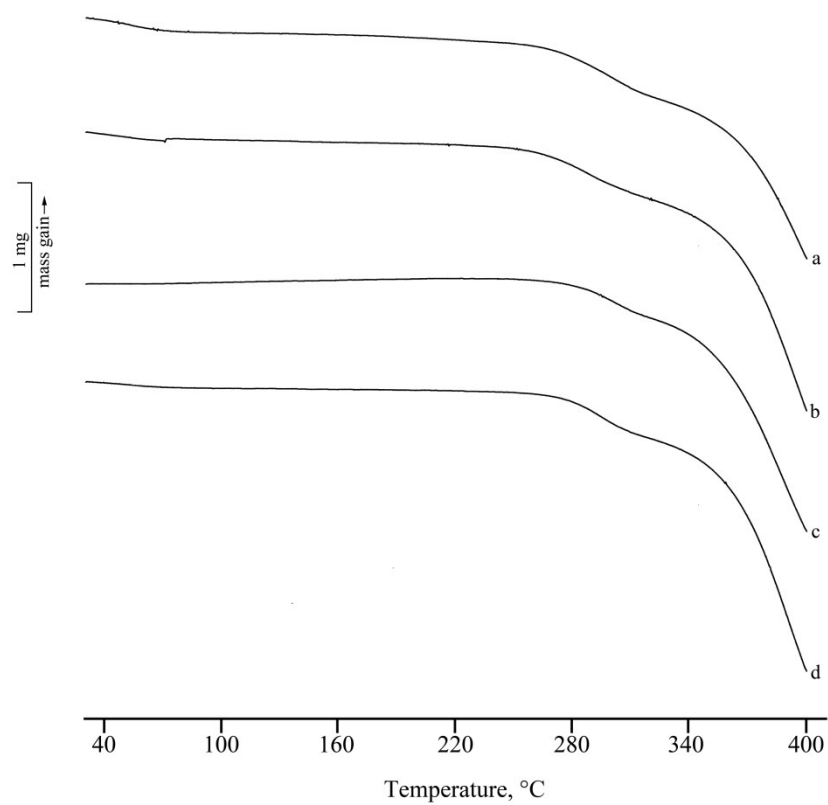

**Figure SI3.** TGA curves for a) HIPE 2.7.1; b) HIPE 2.8.1; c) HIPE 2.10.1; and d) HIPE 2.11.1.

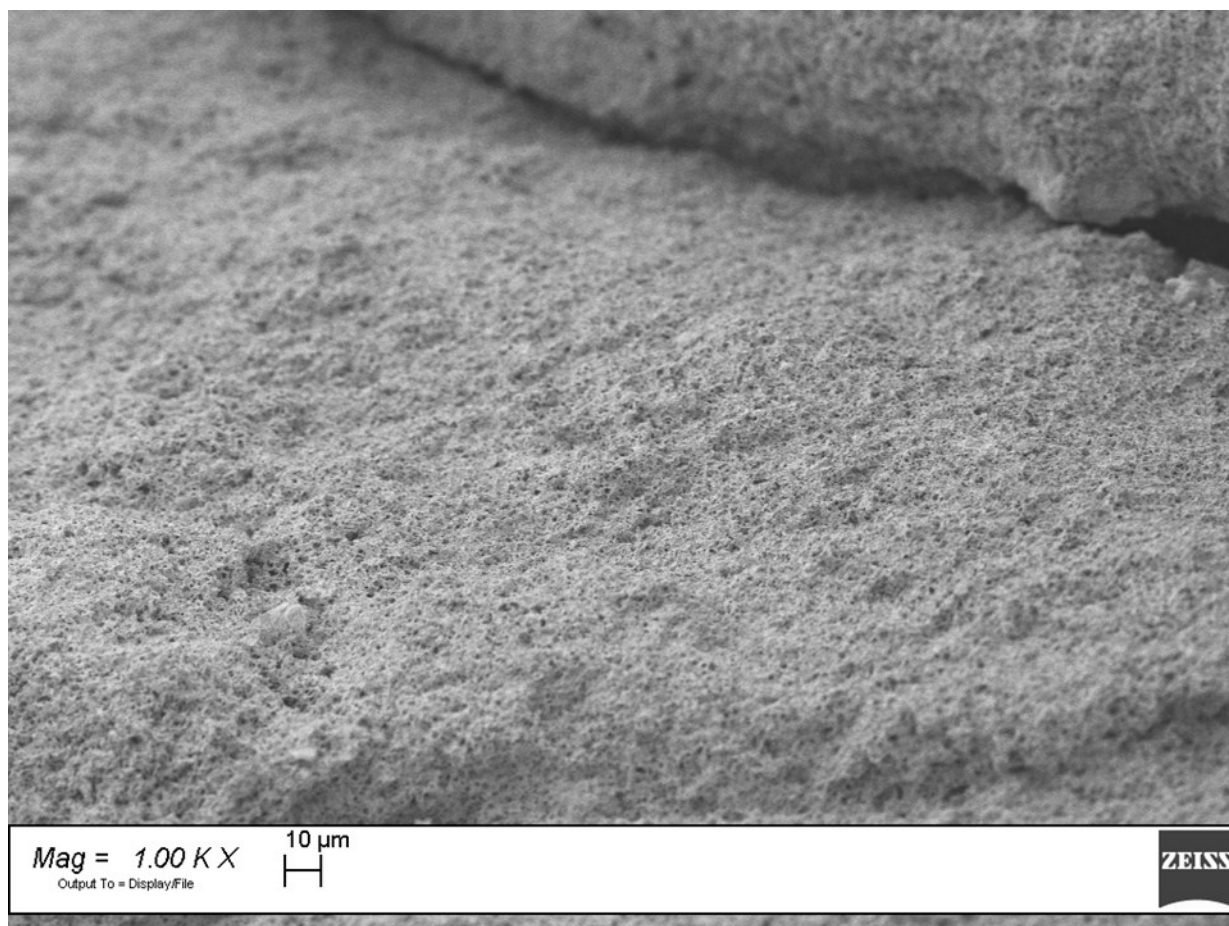

**Figure SI4.** SEM picture of HIPE 2.8.1 at 1000 X

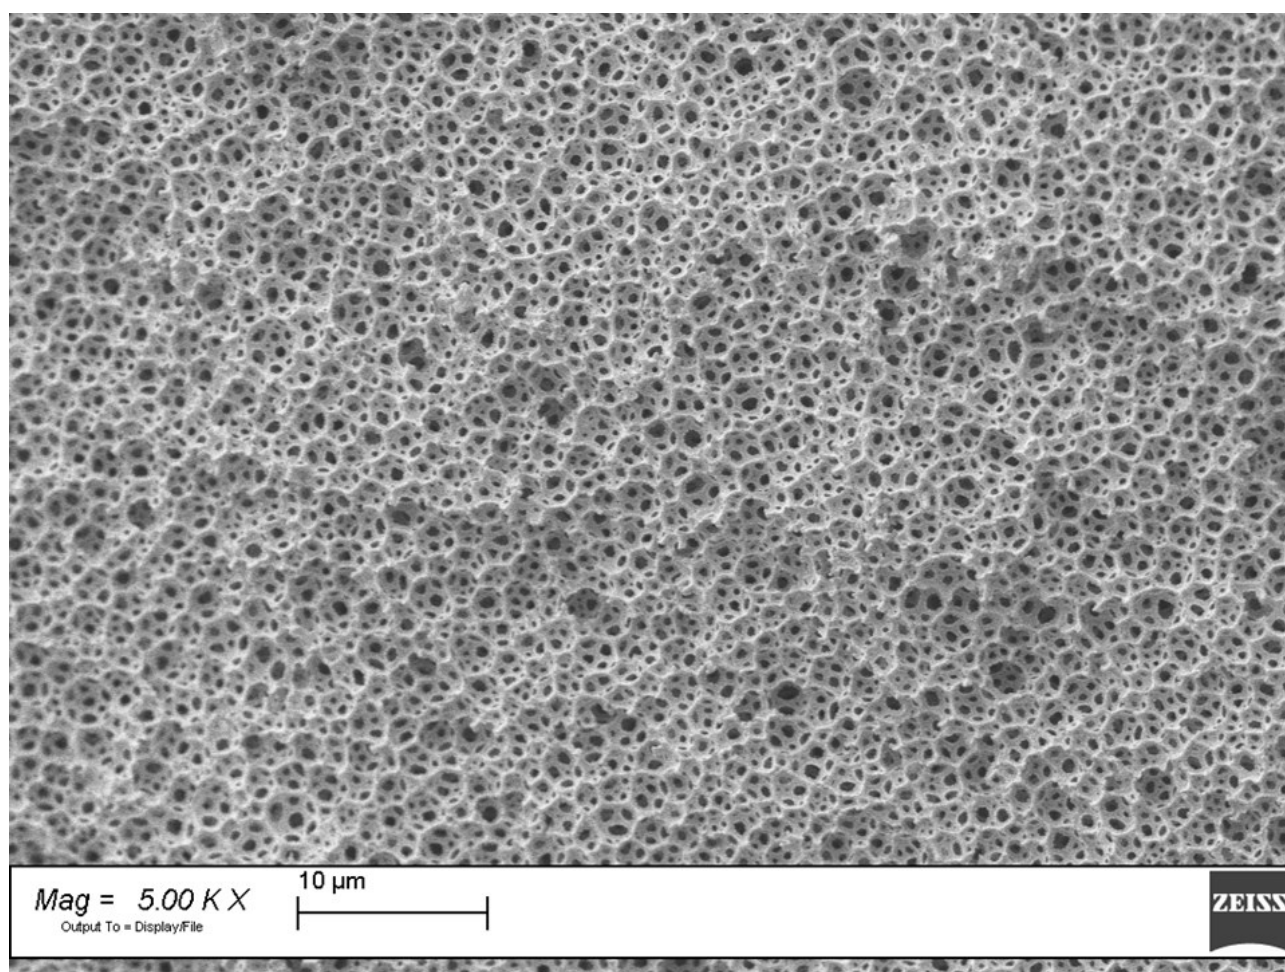

**Figure SI5.** SEM picture of HIPE 2.8.1 at 5000 X

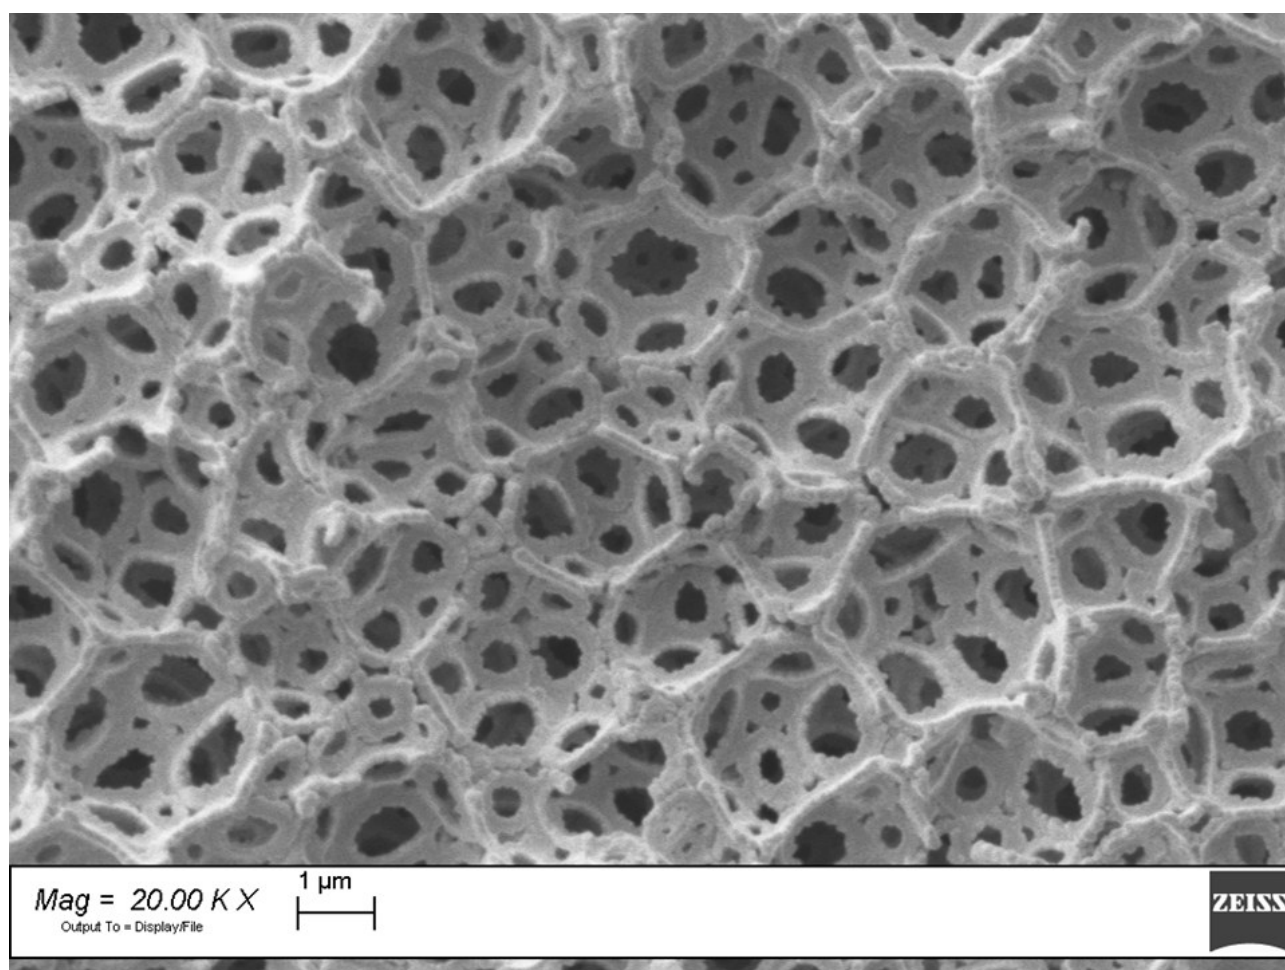

**Figure SI6.** SEM picture of HIPE 2.8.1 at 20000 X

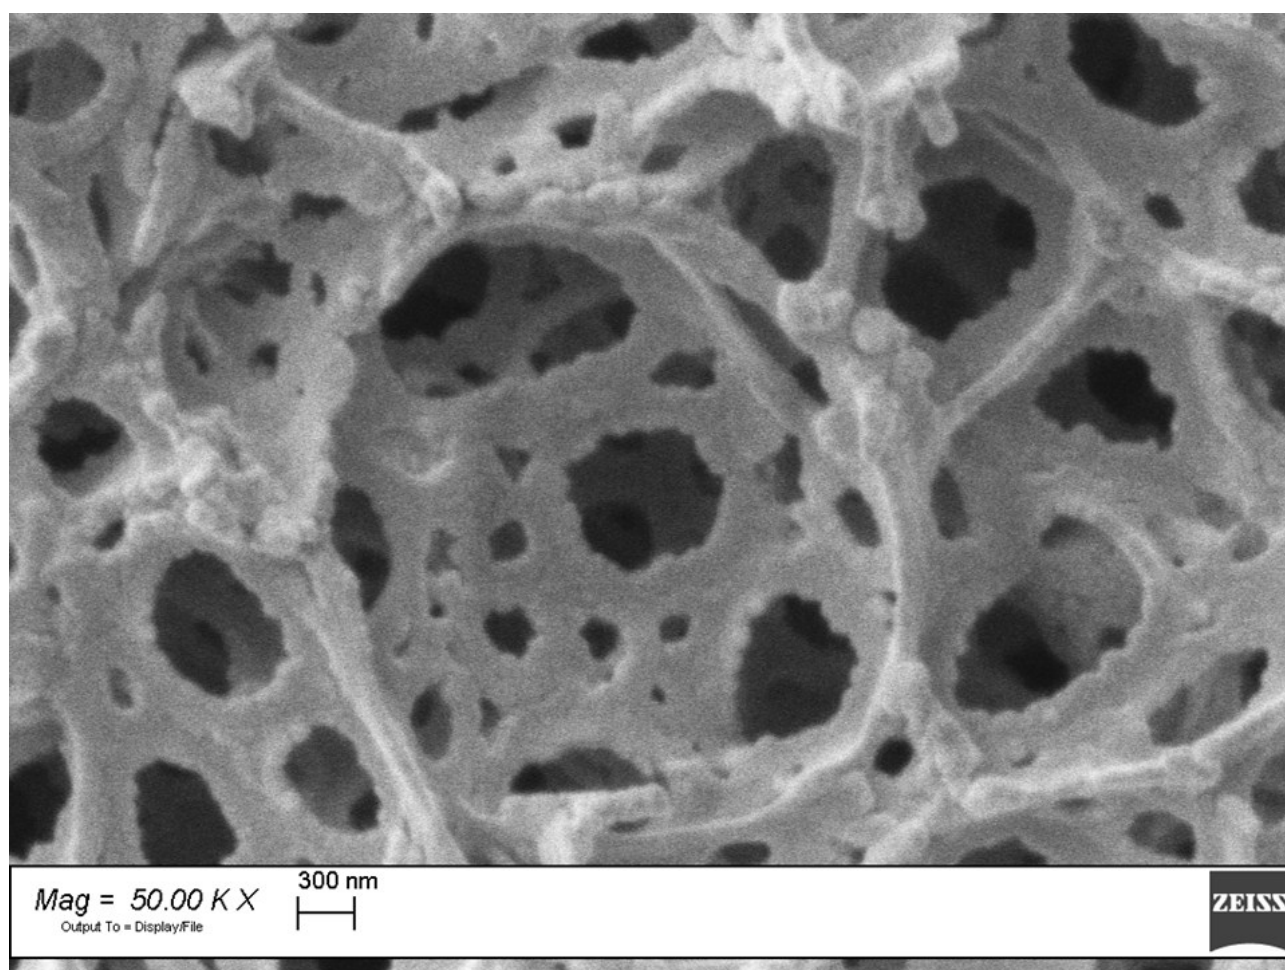

**Figure S17.** SEM picture of HIPE 2.8.1 at 50000 X
